# Supplementary material
Source: MDPI journal article supplement (https://www.mdpi.com/2304-6740/6/2/44)

# Supplementary Materials: A M<sub>2</sub>L<sub>2</sub> Redox-Active Metalla-Macrocycle Based on Electron-Rich 9-(1,3-dithiol-2-ylidene)Fluorene

Serhii Krykun, Magali Allain, Vincent Carré, Frédéric Aubriet, Zoia Voitenko, Sébastien Goeb and Marc Sallé

Figure S1. <sup>1</sup>H NMR spectra of 2 in CDCl<sub>3</sub>

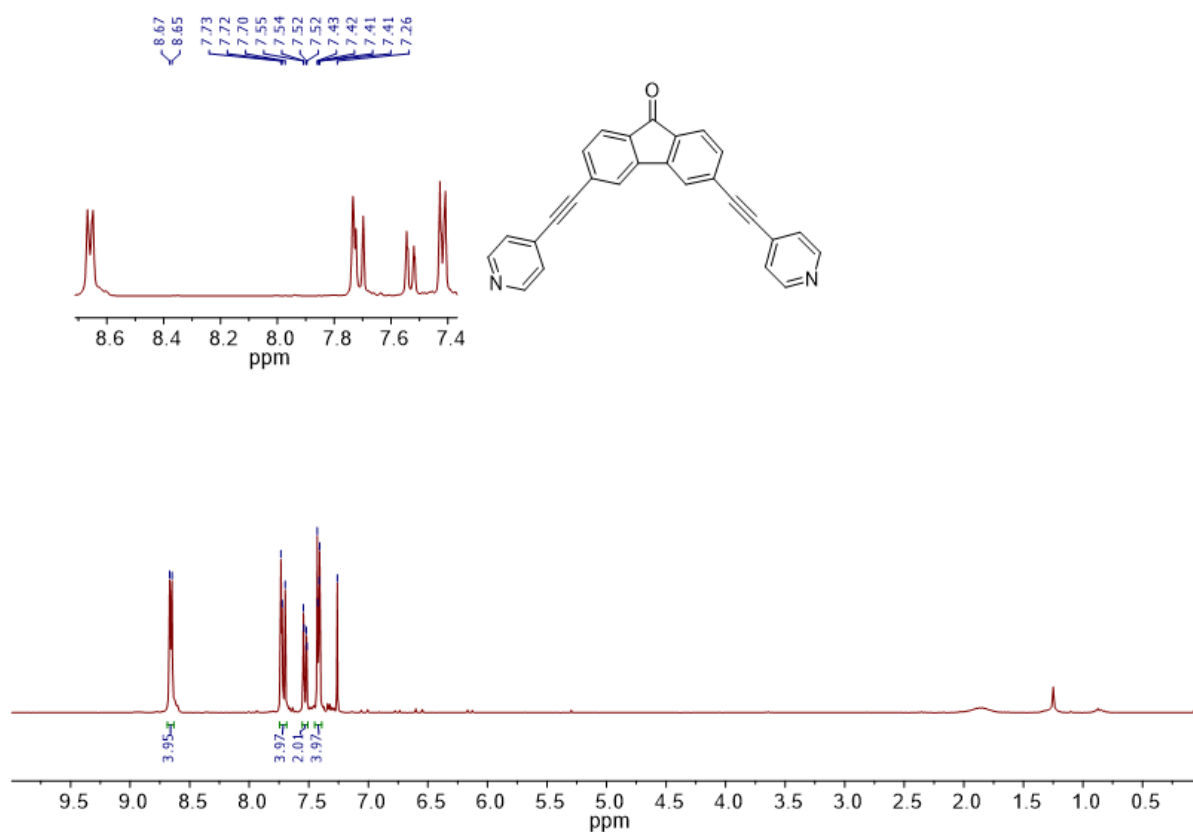

**Figure S2.**  $^{13}\text{C}$  NRM spectrum of **2** in  $\text{CDCl}_3$ 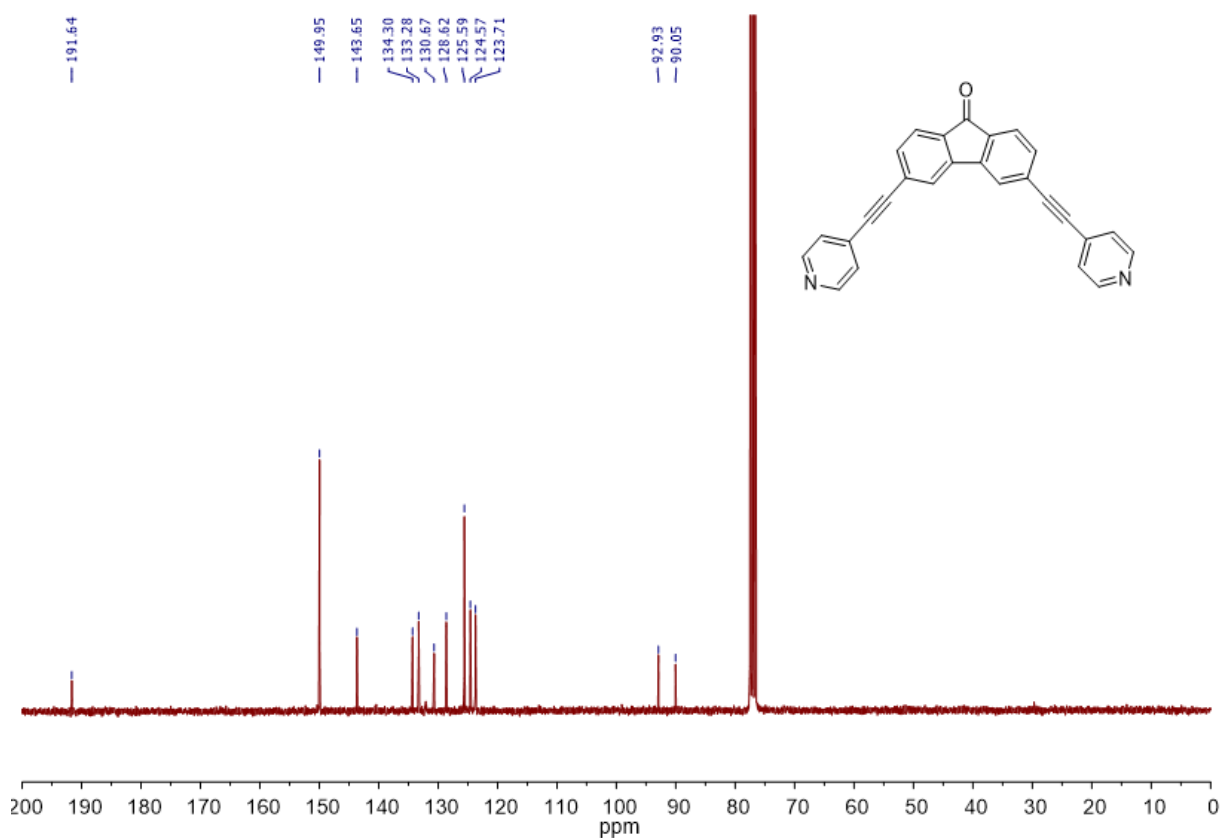**Figure S3.**  $^1\text{H}$  NMR spectra of L4Pyr in  $\text{CDCl}_3$ 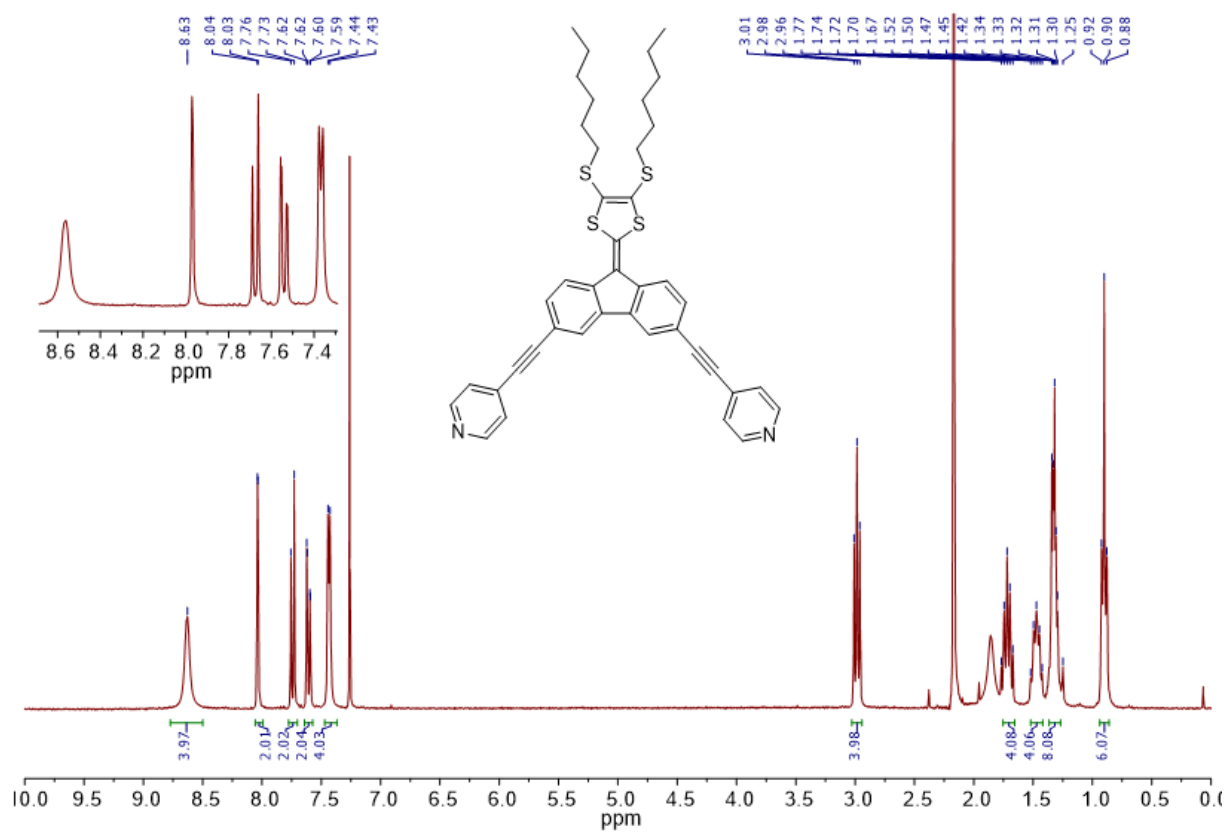

**Figure S4.**  $^{13}\text{C}$  NMR spectra of L4Pyr in  $\text{CDCl}_3$ 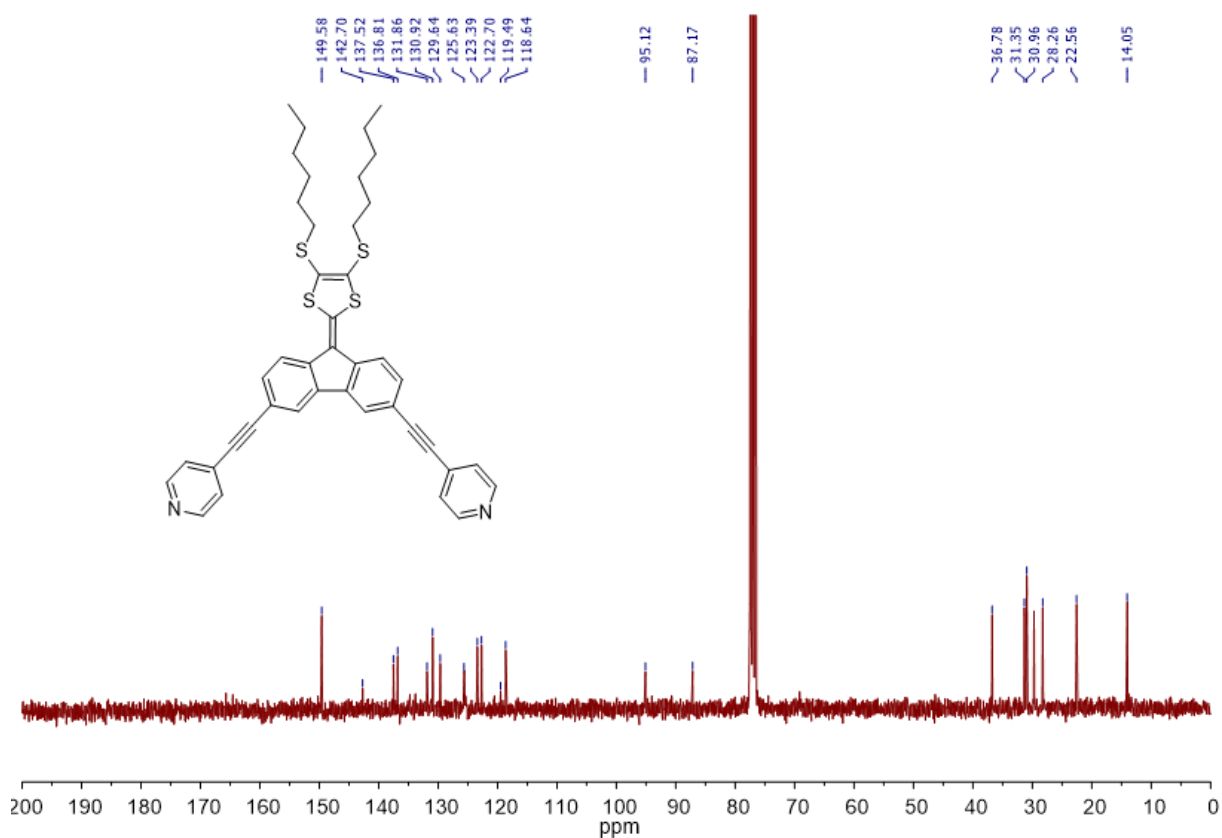**Figure S5.**  $^1\text{H}$  NMR spectra of  $[\text{Pd}_2\text{L4pyr}_2]^{4+}$  in  $\text{CD}_2\text{Cl}_2$ 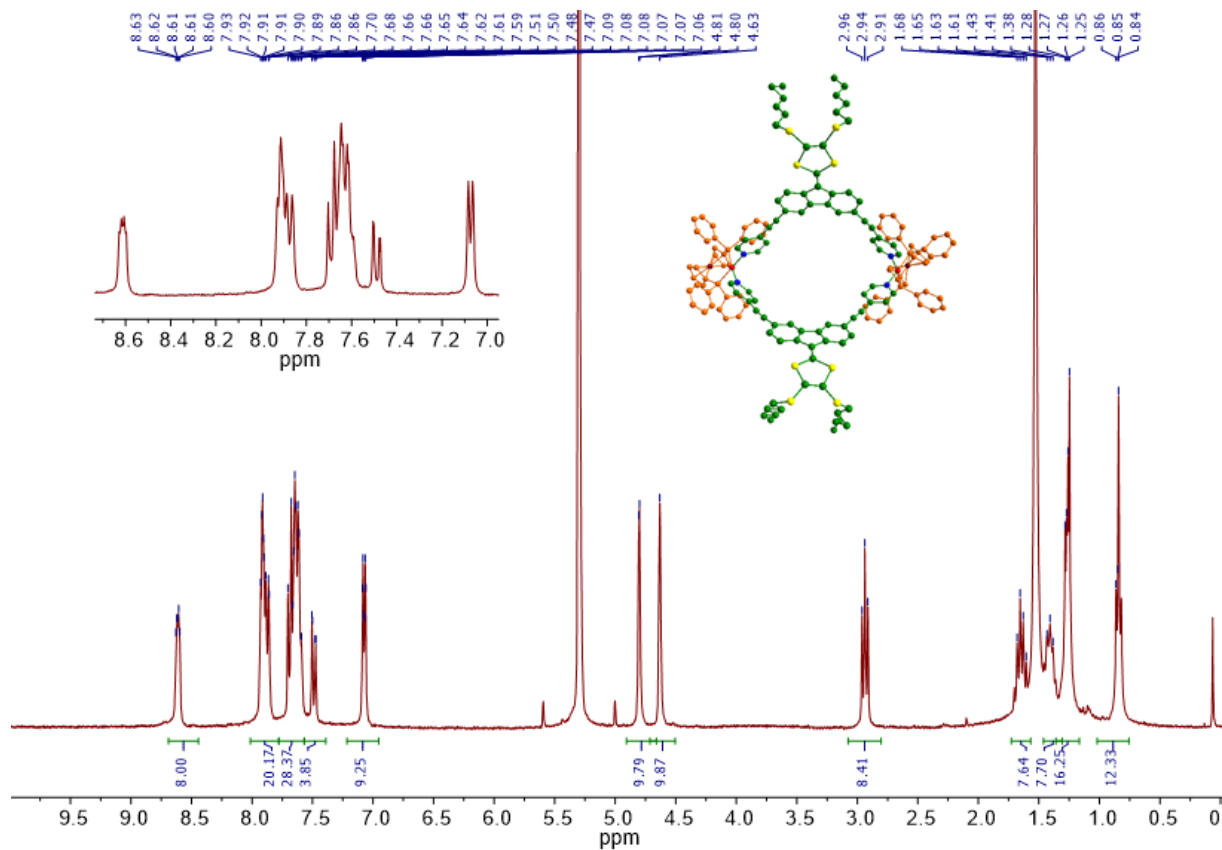

**Figure S6.**  $^{13}\text{C}$  NMR spectra of  $[\text{Pd}_2\text{L4pyr}_2]^{4+}$  in  $\text{CD}_2\text{Cl}_2$ 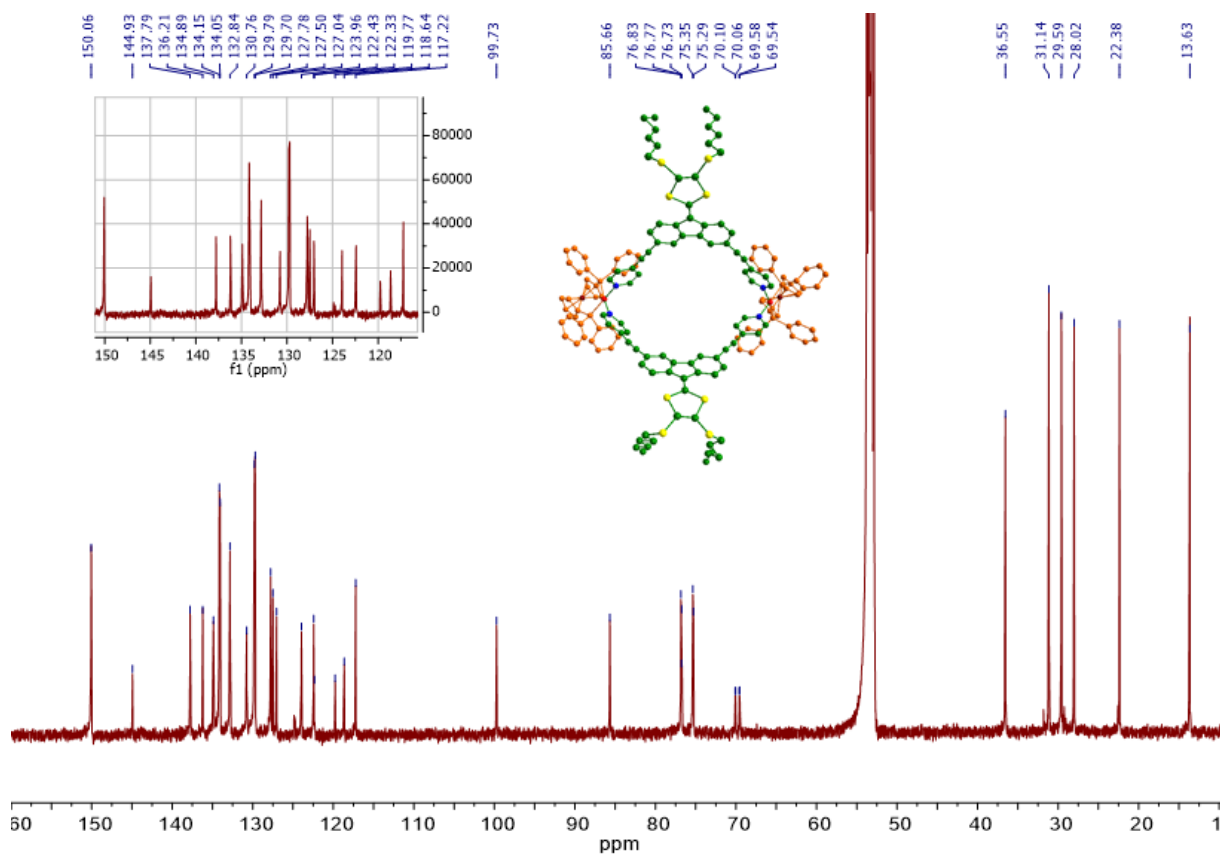**Figure S7.**  $^1\text{H}$  DOSY spectra of  $[\text{Pd}_2\text{L4pyr}_2]^{4+}$  in  $\text{CD}_2\text{Cl}_2$ 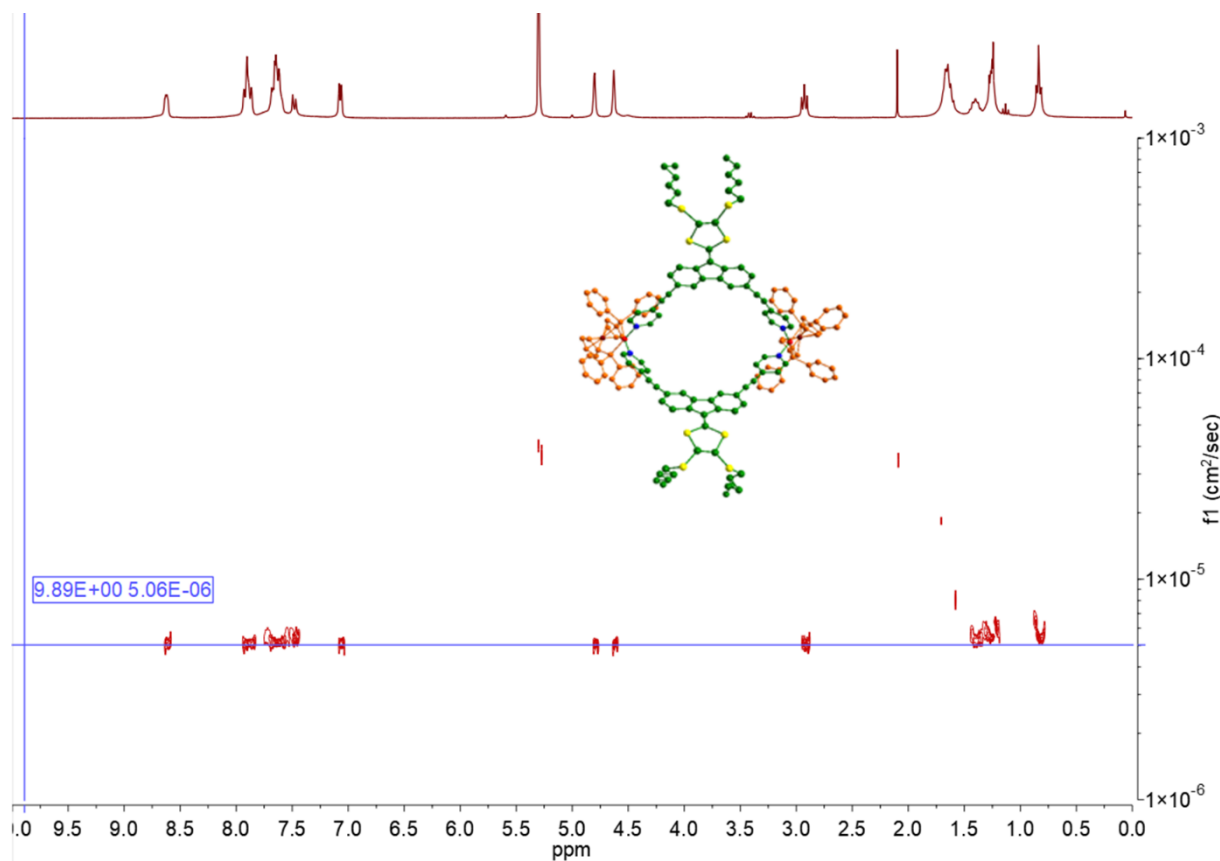

**Figure S8.** ESI-FTICR-MS of metalla-macrocycle  $[\text{Pd}_2(\text{L4Pyr})_2(\text{OTf})_4]$  in  $\text{CH}_2\text{Cl}_2/\text{CH}_3\text{NO}_2$  (9/1) ( $C = 10^{-3}$  M)

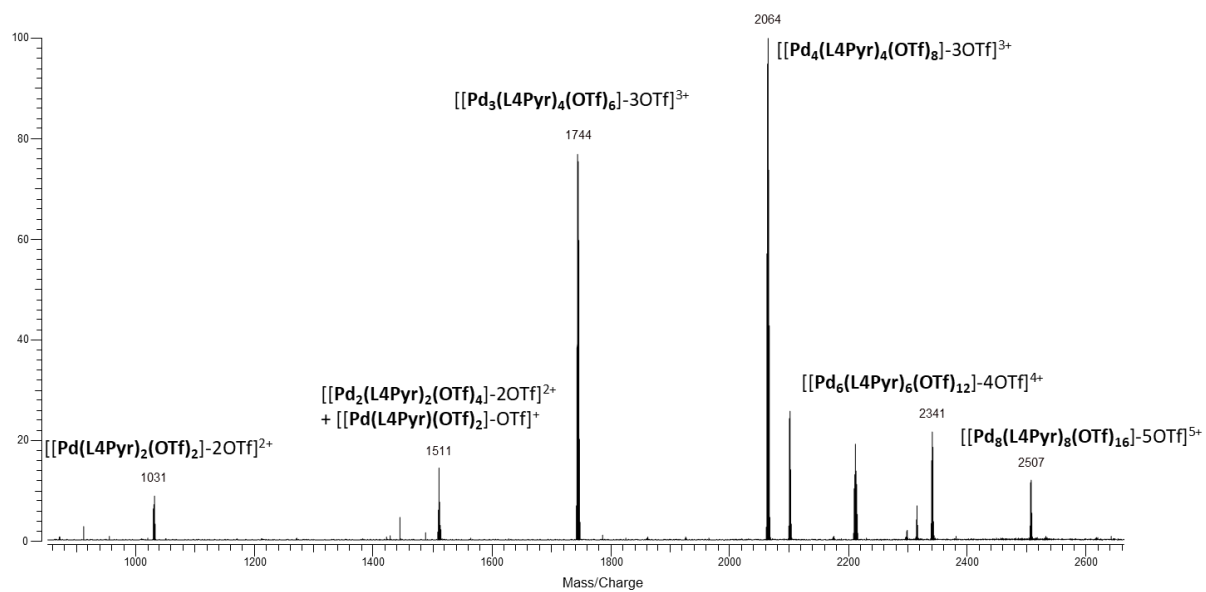

Supplement: s1 [file s1]
